# Supplementary material for: Correlation dispersion as a measure to better estimate uncertainty in remotely sensed glacier displacements
Source: Copernicus journal article supplement (doi:10.5194/tc-16-2285-2022), 2022-06-15
Supplement: Supplementary file 1 [file tc-16-2285-2022-supplement.zip]

Archive with 8 entries (8 files):
- highpassIm.m
- toyExample.m
- patternMatchExample.m
- toyExample.py
- tc-16-2285-2022-supplement-title-page.pdf
- estGauss.m
- T22WEB_20200720T151911_B04_clip.jp2
- T22WEB_20200730T151921_B04_clip.jp2
