# Supplementary material for: Correlation dispersion as a measure to better estimate uncertainty in remotely sensed glacier displacements
Source: Copernicus journal article supplement (doi:10.5194/tc-16-2285-2022), 2022-06-15
Supplement: Supplementary file 1 [file tc-16-2285-2022-supplement.zip › tc-16-2285-2022-supplement-title-page.pdf]

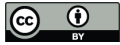

## *Supplement of*

# **Correlation dispersion as a measure to better estimate uncertainty in remotely sensed glacier displacements**

**Bas Altena et al.**

*Correspondence to:* Bas Altena (b.altena@uu.nl)

- tc-16-2285-2022-supplement-title-page.pdf
- T22WEB\_20200720T151911\_B04\_clip.jp2
- T22WEB\_20200730T151921\_B04\_clip.jp2
- estGauss.m
- highpassIm.m
- patternMatchExample.m
- toyExample.m
- toyExample.py

The copyright of individual parts of the supplement might differ from the article licence.
